Supplemental Table 1

| <i>L/D</i> Ratio (y)            | Isometric Scaling Exponent ( $b_0$ ) | Measured Scaling Exponent (b) | Lower 95% C.I. | Upper 95% C.I. | R <sup>2</sup> |
|---------------------------------|--------------------------------------|-------------------------------|----------------|----------------|----------------|
| <i>L/D</i> <sub>anterior</sub>  | 0.000                                | *0.119                        | 0.086          | 0.159          | 0.668          |
| <i>L/D</i> <sub>middle</sub>    | 0.000                                | *0.138                        | 0.102          | 0.183          | 0.683          |
| <i>L/D</i> <sub>posterior</sub> | 0.000                                | *0.140                        | 0.088          | 0.206          | 0.526          |

Supplemental Table 1: **Scaling of *L/D* ratios for diameters sampled along the length of the worm** (see text for details). Length refers to body length. \* Indicates the C.I.s do not overlap with  $b_0$ . N=25

Supplemental Table 2

|               | Isometric Scaling<br>Exponent ( $b_0$ ) | Measured Scaling<br>Exponent ( $b$ ) | Lower 95% C.I. | Upper 95% C.I. | $R^2$ |
|---------------|-----------------------------------------|--------------------------------------|----------------|----------------|-------|
| Segments/Wave | 0.000                                   | 0.0607                               | -0.207         | 2.793          | 0.021 |

Supplemental Table 2: **Scaling of number of segments used in peristaltic waves during crawling as a function of body mass.** Averaged from 5 measurements per worm. N=24.
